# Supplementary material for: Unexpected and then rational synthesis of a new class of anionic phosphino–oxazoline ligands; structure and catalytic properties of a ruthenium complex
Source: Royal Society of Chemistry journal article supplement (doi:10.1039/b002515l), 2000-01-01
Supplement: b002515l.doc [file b002515l.doc]

**Synthesis and spectral characterisation of complexes 1-3**

[Ru(OAc)(PCH2oxMe2)2]Cl. - A suspension of [RuCl2(PCH2oxMe2)2] (0.255 g, 0.330 mmol) and Tl(OAc) (0.174 g, 0.660 mmol) in CH2Cl2 (20 mL) was stirred overnight, the white precipitate was filtered off, the yellow solution was concentrated to about 2 mL and addition of Et2O afforded a yellow precipitate which was further washed with 2 x 10 mL of Et2O. The yellow powder was dried *in vacuo* (0.215 g, yield: 80%). 1H NMR (CDCl3, 300.13 MHz):  1.20 (s, 6 H, NC(CH3)2), 1.40 (s, 6 H, NC(CH3)2), 2.15 (s, 3 H, O2CCH3), ABXX’ spin system A 2.20 (“filled-in d”, 2 H, 2*J*HH = 18.3, 2+4*J*PH = 8.2 Hz, PC*H*H), B 2.65 (“filled-in d”, 2 H, 2*J*HH = 18.3, 2+4*J*PH = 13.1 Hz, PCH*H*), AB spin system A 4.40 (d, 2 H, 2*J*HH = 8.1 Hz, OCH2), 4.55 (d, 2 H, 2*J*HH = 8.1 Hz, OCH2), 6.80 (m, 4 H, aryl H), 7.30-7.70 (m, 16 H, aryl H). 13C{1H} (CDCl3, 75.4 MHz): 26.0 (s, NC(*C*H3)2), 26.5 (s, O2C*C*H3), 29.0 (s, NC(*C*H3)2), 31.5 (“filled-in d”, 2*J*XX’ cis = 37.5, 1*J*AX = 33.2, 3*J*AX = -1.7, PCH2), 69.0 (s, N*C*(CH3)2), 83.0 (s, OCH2), 125.2-135.0 (m, aryl), 172.9 (m, C=N), 189.5 (s, O2*C*CH3).31P{1H} NMR (CDCl3, 121.5 MHz): 53.7. Anal. Calc. for C38H43ClN2O4P2Ru: C, 57.76; H, 5.48; N, 3.54. Found: C, 58.15; H, 5.54; N, 3.69.

[Ru(OAc)(PCHoxMe2)(PCH2oxMe2)] **2**. - A THF (20 mL) solution containing **1** (0.100 g, 0.126 mmol) and*t*-BuOK (0.014 g, 0.126 mmol) quickly turned from yellow to orange with formation of a grey precipitate. After tthe reaction mixture was stirred overnight, the solvent was removed under reduced pressure, toluene (40 mL) was added and the white precipitate was filtered off, the volume of the solution was reduced to *ca*. 2 mL and addition of pentane afforded an orange solid which was further washed with pentane (2 x 10 mL) and dried *in vacuo*. (0.080 g, yield 84%). 1H NMR (C6D6, 300.13 MHz):  0.75 (s, 3 H, NC(C*H*3)(CH3)), 1.05 (s, 3 H, NC(CH3)(C*H*3)), 1.20 (s, 3 H, NC(CH3)(C*H*3)), 1.40 (s, 3 H, NC(CH3)(C*H*3)), 2.05 (s, 3 H, OOCH3), AB spin system A 3.90 (d, 1H, 2*J*PH = 7.2 Hz, OC*H*H), A 4.00 (d, 1 H, 2*J*PH = 8.4 Hz, OC*H*H), 4.05 B (d, 1 H, 2*J*PH = 7.2 Hz, OCH*H*), 4.25 B (d, 1 H, 2*J*PH = 8.4 Hz, OCH*H*), 6.80-7.80 (m, 20 H, aryl).31P{1H} NMR (C6D6/THF, 121.5 MHz): AB spin system 46.8 (d, 2*J*PP’ = 35.8 Hz, PCHoxMe2), 58.3 (d, 2*J*PP’ = 35.8 Hz, PCH2oxMe2). Anal. Calc. for C38H42N2O4P2Ru: C, 60.55; H, 5.62. Found: C, 60.36; H, 5.84.

[Pd(dmba)(PCHox)] **3**. - The complex [Pd(dmba)Cl(PCH2ox)] (1.020 g, 1.875 mmol) was reacted with *t*-BuOK (0.220 g, 1.970 mmol) in THF (20 mL). The colourless suspension turned yellow within 5 min with formation of a white precipitate and the reaction mixture was stirred for 12 h. The solvent was removed under reduced pressure and CH2Cl2 (30 mL) was added. The solution was filtered, concentrated and addition of pentane afforded a yellow solid which was further washed with hexane (2 x 20 mL) and dried *in vacuo*. The product was obtained as a yellow powder (0.800 g, yield 84%). 1H NMR (CD2Cl2, 300.13 MHz):  2.80 (s, 6 H, N(CH3)2), 3.70 (t, 2 H, 3*J*HH = 7.9 Hz, oxazoline NCH2), 3.95 (s, 2 H, (CH3)2NC*H*2), 4.30 (t, 2 H, 3*J*HH = 7.9 Hz, OCH2), 6.55-7.00 (m, 4 H, aryl from dmba), 7.40-7.70 (m, 10 H, aryl).31P{1H} NMR (CDCl3, 121.5 MHz):  Anal. Calc. for C25H27N2OPPd: C, 59.01; H, 5.35; N, 5.50. Found: C, 58.79; H, 5.22; N, 5.46.
